# Supplementary material for: Characterization and ligand identification of a membrane progesterone receptor in fungi: existence of a novel PAQR in Sporothrix schenckii
Source: PubMed Central journal article supplement (PMC3488014; doi:10.1186/1471-2180-12-194), 2012-09-07

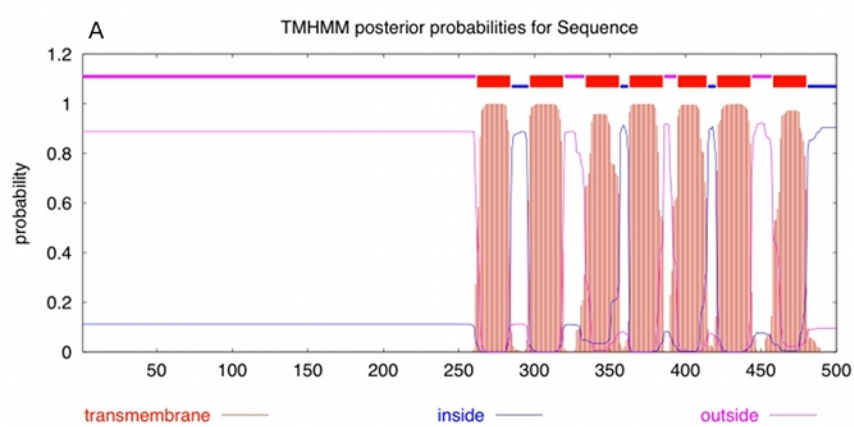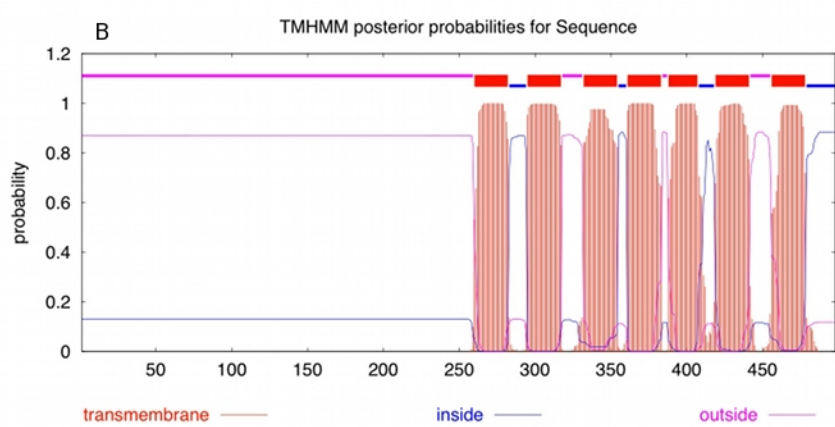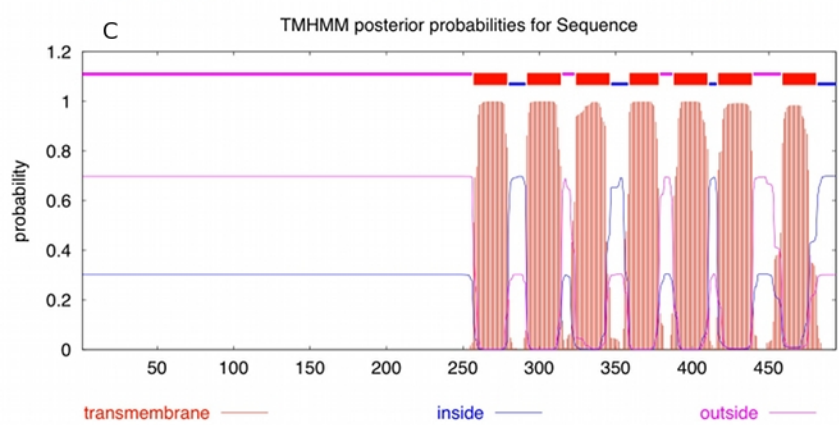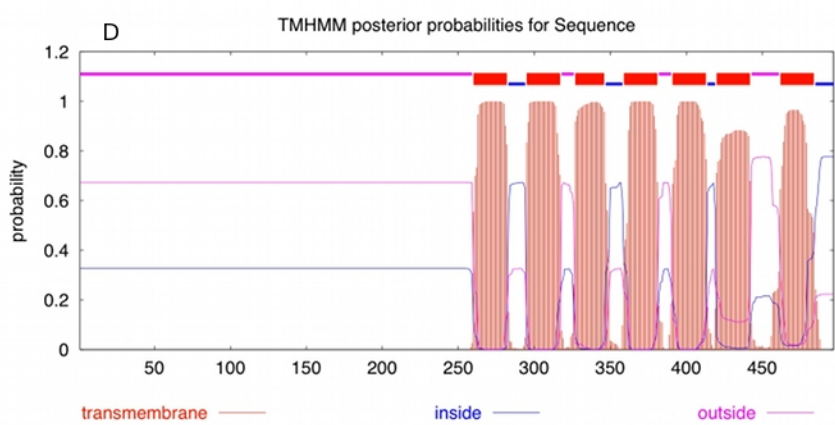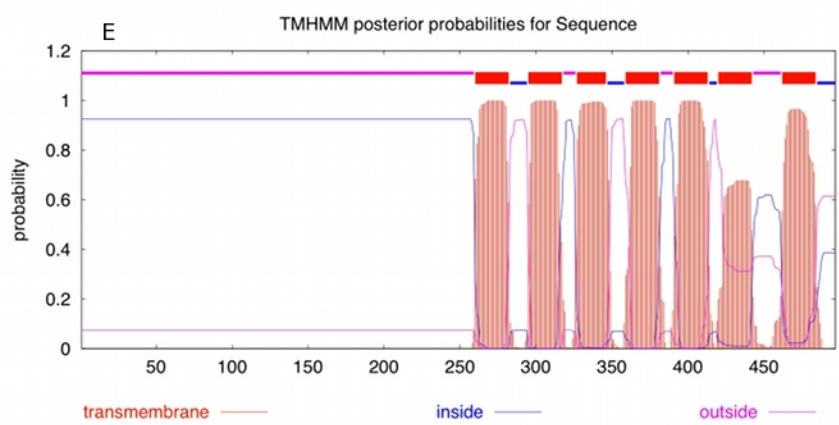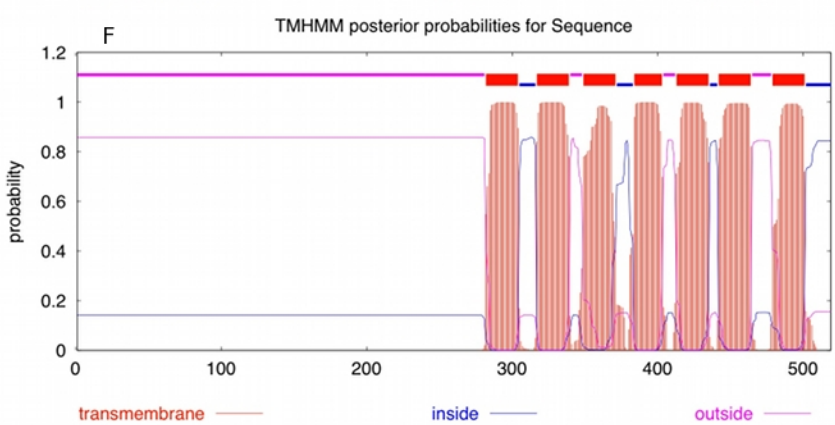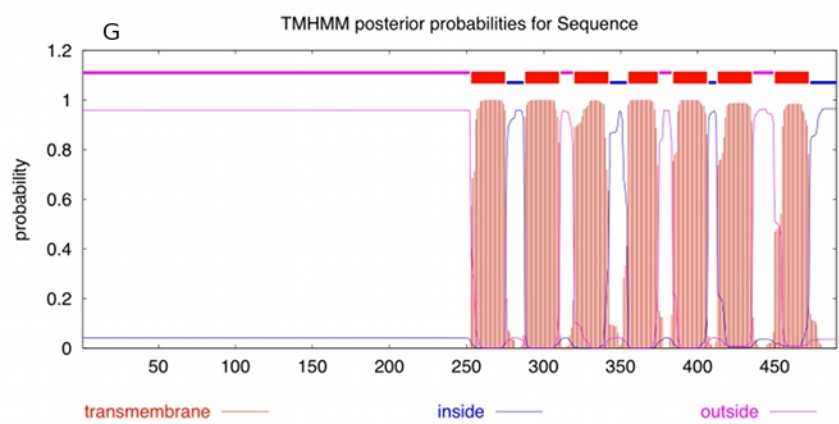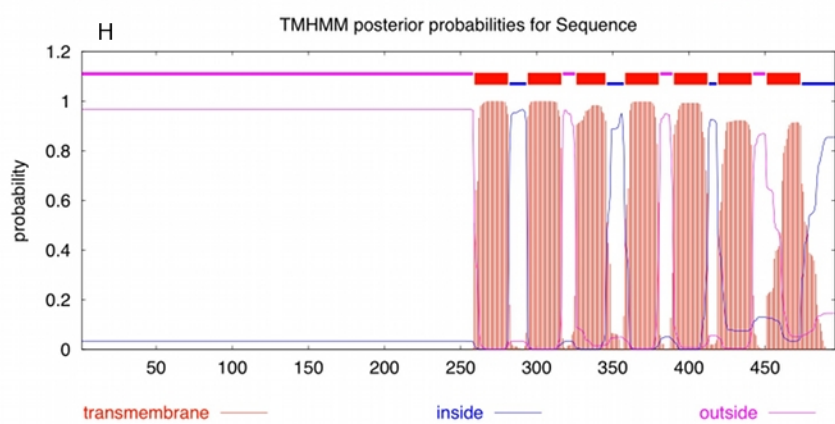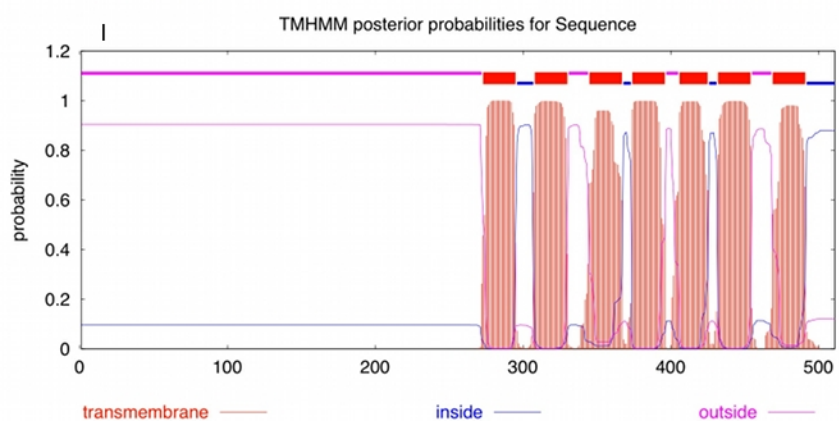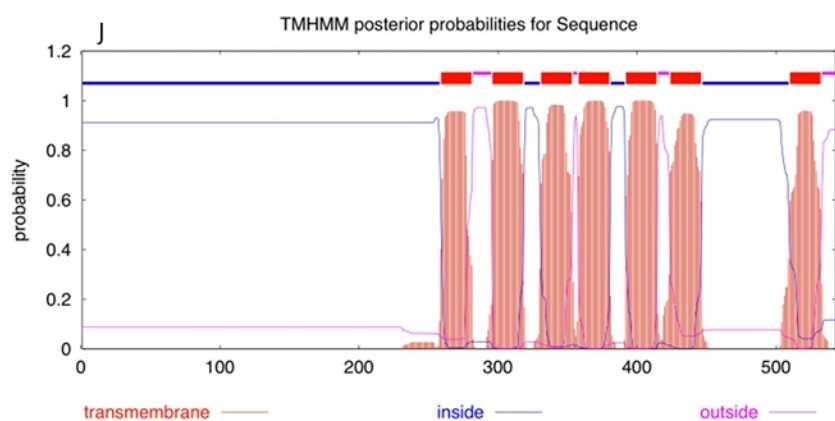

Supplement: 1471-2180-12-194-S2.pdf [file 1471-2180-12-194-S2.pdf]
